# Supplementary material for: Magnetic Co-based carbon materials derived from core–shell metal–organic frameworks for organic contaminant elimination with peroxymonosulfates
Source: Royal Society of Chemistry journal article supplement (doi:10.1039/c9dt01610d), 2019-01-01
Supplement: c9dt01610d1.pdf [file c9dt01610d1.pdf]

## Supporting Information

### Magnetic Co-based carbon materials derived from core-shell metal-organic frameworks for organic contaminants elimination

Yannan Xia<sup>1</sup>, Junchu He<sup>1</sup>, Shan Chen, Shiyuan Gao, Ping Lu, Wentao Wang, Yuyuan Yao\*

*Key Laboratory of Advanced Textile Materials and Manufacturing Technology, Ministry of Education, Zhejiang Sci-Tech University, Hangzhou 310018, PR China.*

*E-mail: yyy0571@126.com; Fax: +86 571 86843255; Tel.: +86 571 86843810*

**Table S1** Removal rate of different dyes in the NC@Co-GC/PMS system in 14 min under the same condition.

| Dyes           | Removal rate |
|----------------|--------------|
| Acid Red 1     | 99.5%        |
| Acid Orange 7  | 99.1%        |
| Methyl Orange  | 99.7%        |
| Methylene Blue | 91.1%        |
| Reactive Red   | 98.9%        |
| Reactive Blue  | 97.9%        |

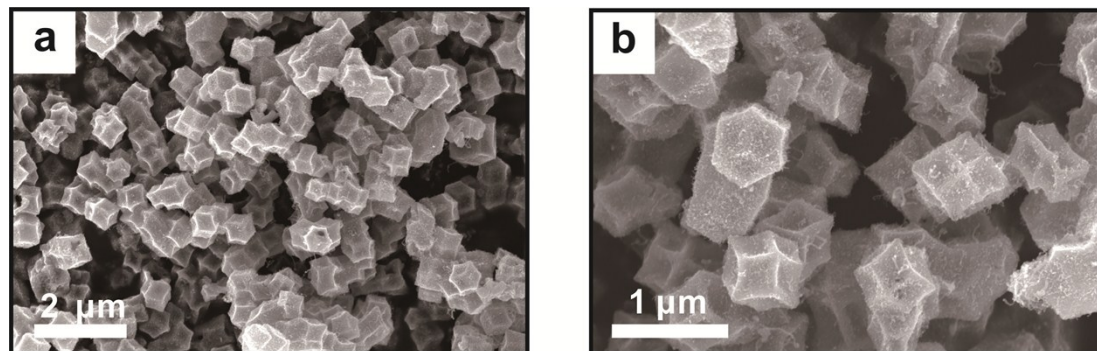

**Fig S1.** SEM images of the NC@Co-GC.

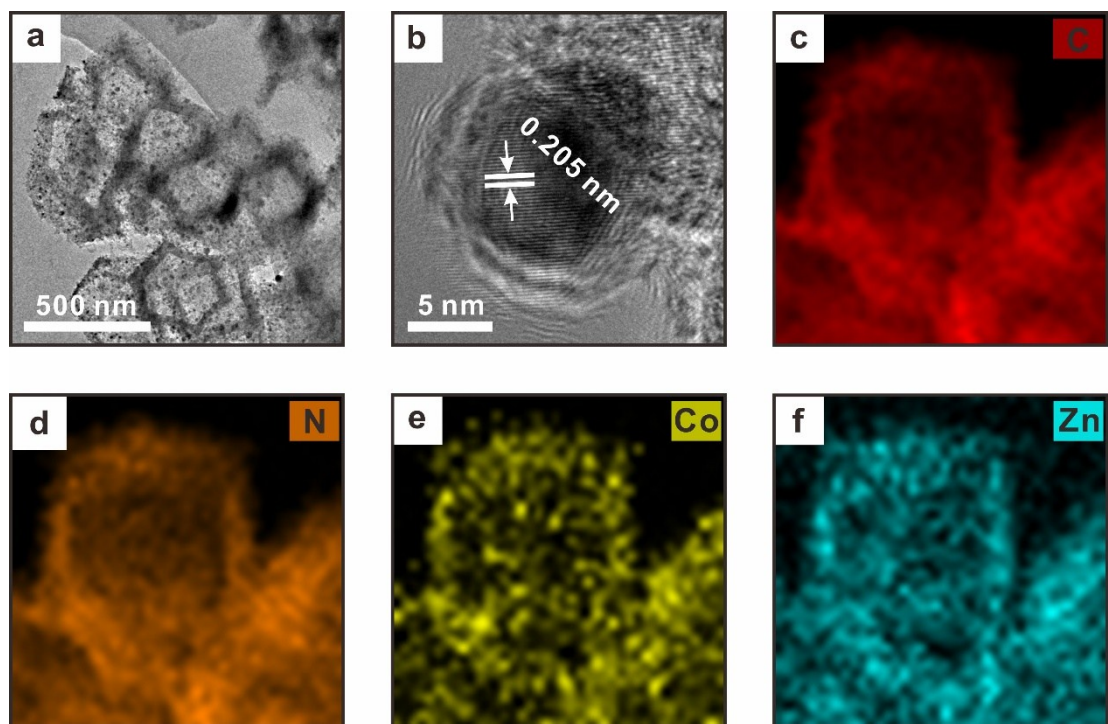

**Fig S2.** (a) TEM images (b) HRTEM images and (c-f) elemental mappings of the NC@Co-GC.

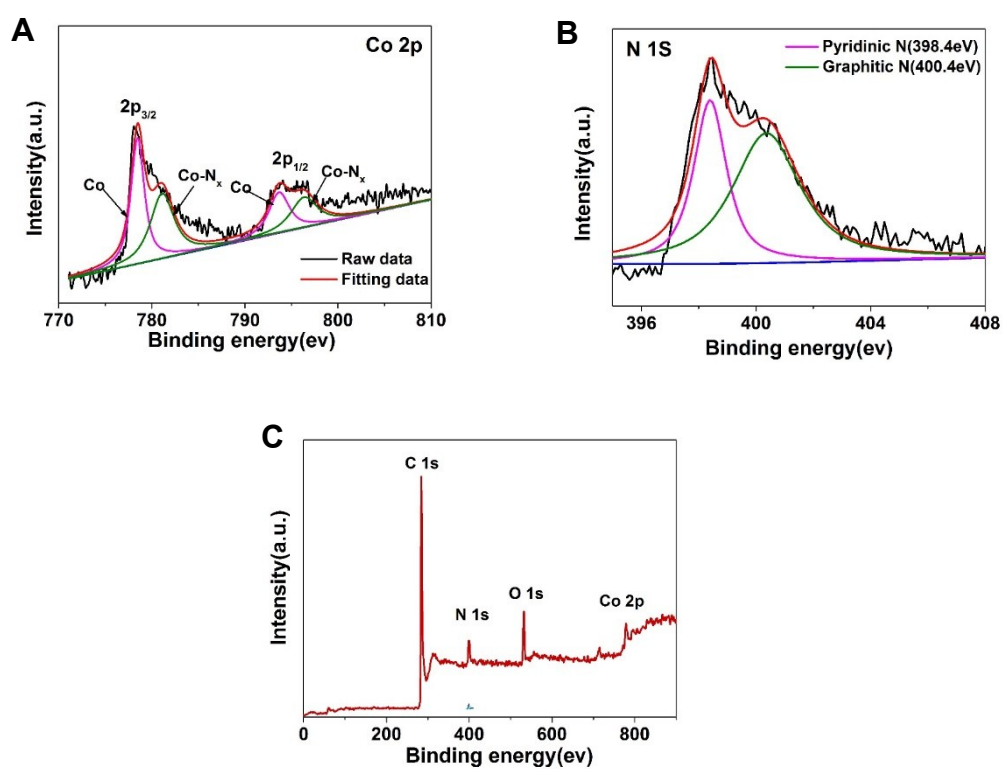

**Fig S3.** XPS spectra of (A) Co 2p (B) N 1s (C) element composition of NC@Co-GC.

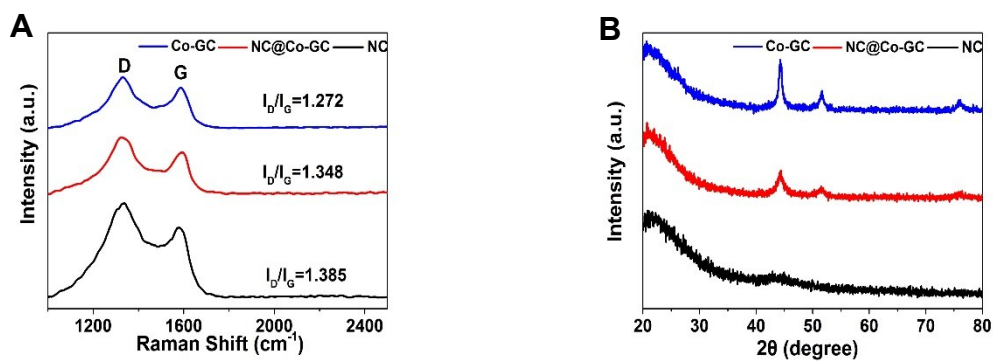

**Fig S4.** (A) Raman spectra and (B) X-ray diffraction patterns of different NPCs. (A colour version of this figure can be viewed online).

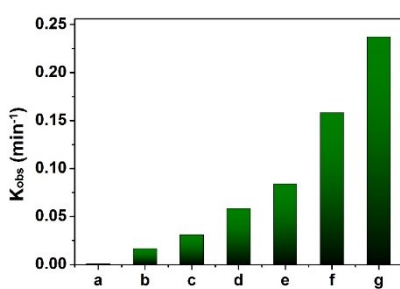

**Fig S5.** Rate constant of 3BF removal in different oxidation systems: (a) PMS; (b) NC@Co-GC; (c)  $\text{Co}_3\text{O}_4/\text{PMS}$  (d)  $\text{Co}^{2+}/\text{PMS}$ ; (e) NC/PMS; (f) GC/PMS; (g) NC@Co-GC/PMS. Reaction conditions:  $[\text{3BF}] = 50\mu\text{M}$ ,  $[\text{PMS}] = 0.5\text{ mM}$ ,  $[\text{NC@Co-GC}] = 0.15\text{ g/L}$ ,  $[\text{Co}^{2+}] = 0.23\text{ ppm}$ ,  $[\text{NC}] = 0.15\text{ g/L}$   $[\text{Co-GC}] = 0.15\text{ g/L}$ ,  $T = 25\text{ }^\circ\text{C}$ , initial pH 10.0.

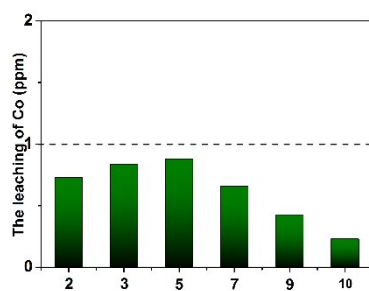

**Fig S6.** Leaching content in the NC@Co-GC/PMS under different pH. Reaction conditions:  $[\text{3BF}] = 50\mu\text{M}$ ,  $[\text{PMS}] = 0.5\text{ mM}$ ,  $[\text{NC@Co-GC}] = 0.15\text{ g/L}$ ,  $T = 25\text{ }^\circ\text{C}$ .

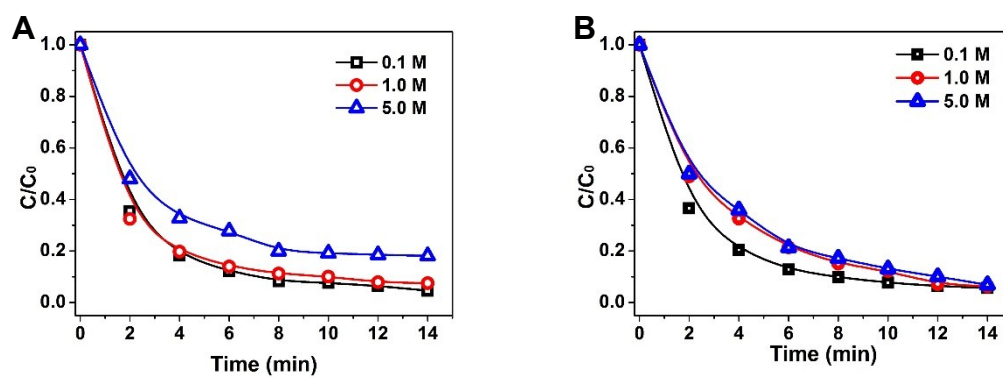

**Fig S7.** Effects of (A) ethyl alcohol (EA) and (B) tert-butyl alcohol (TBA) in the removal of 3BF in the NC@Co-GC/PMS system. Reaction conditions: [3BF] = 50  $\mu$ M, [PMS] = 0.5 mM, [NC@Co-GC] = 0.15 g/L, T = 25  $^{\circ}$ C, initial pH 10.0.
